# Supplementary material for: Effective synthesis of dimethylhexane-1,6-dicarbamate from 1,6-hexanediamine and dimethyl carbonate using 3-amino-1,2,4-triazole potassium as a solid base catalyst at ambient temperature
Source: Royal Society of Chemistry journal article supplement (doi:10.1039/c6gc02509a), 2016-01-01
Supplement: c6gc02509a1.pdf [file c6gc02509a1.pdf]

Supplementary Information:

## Effectively synthesis of dimethylhexane-1,6-dicarbamate from 1,6-hexanediamine and dimethyl carbonate using 3-Amino-1,2,4-triazole potassium as a solid base catalyst at ambient temperature

Peixue Wang,<sup>a,b</sup> Yuqing Fei,<sup>a</sup> Qinghe Li,<sup>a</sup> Youquan Deng,<sup>\*a,b</sup>

Received (in XXX, XXX) Xth XXXXXXXXXX 20XX, Accepted Xth XXXXXXXXXX 20XX

DOI: 10.1039/b000000x

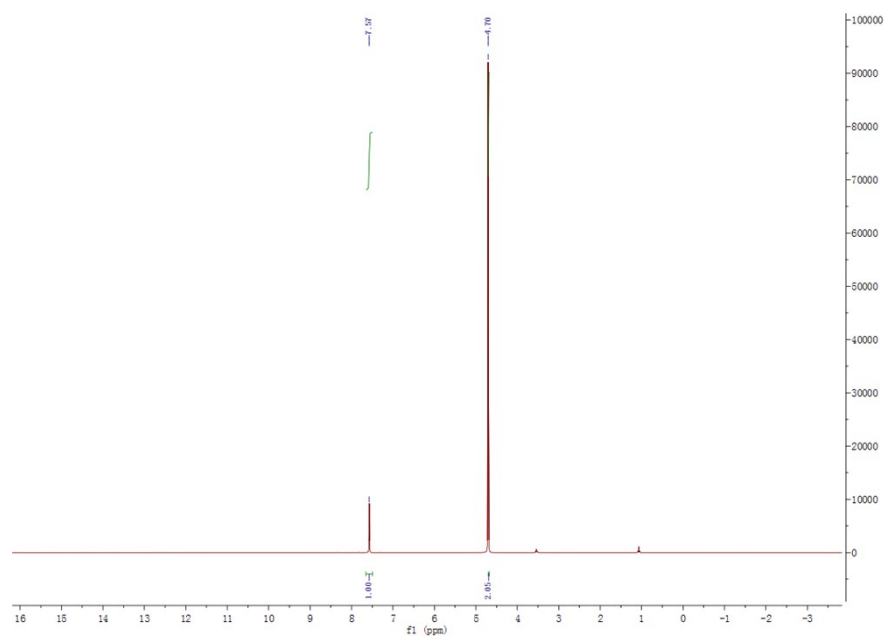

Fig. S1 <sup>1</sup>H NMR spectra of 1,2,4-Triazole potassium salt.

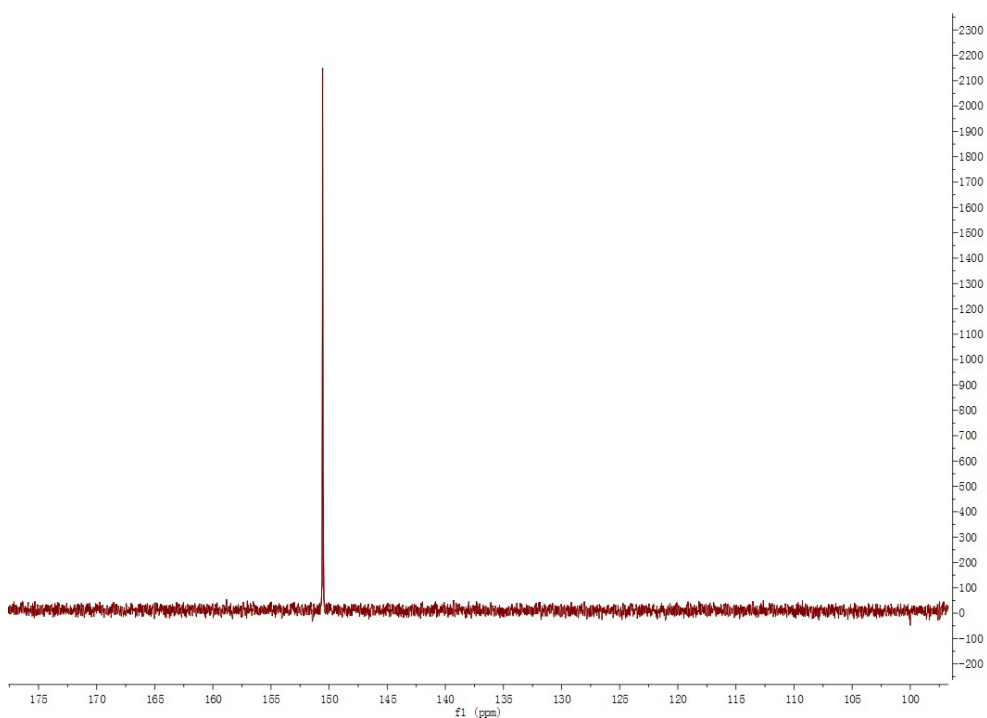

**Fig. S2**  $^{13}\text{C}$  NMR spectra of 1,2,4-Triazole potassium salt.

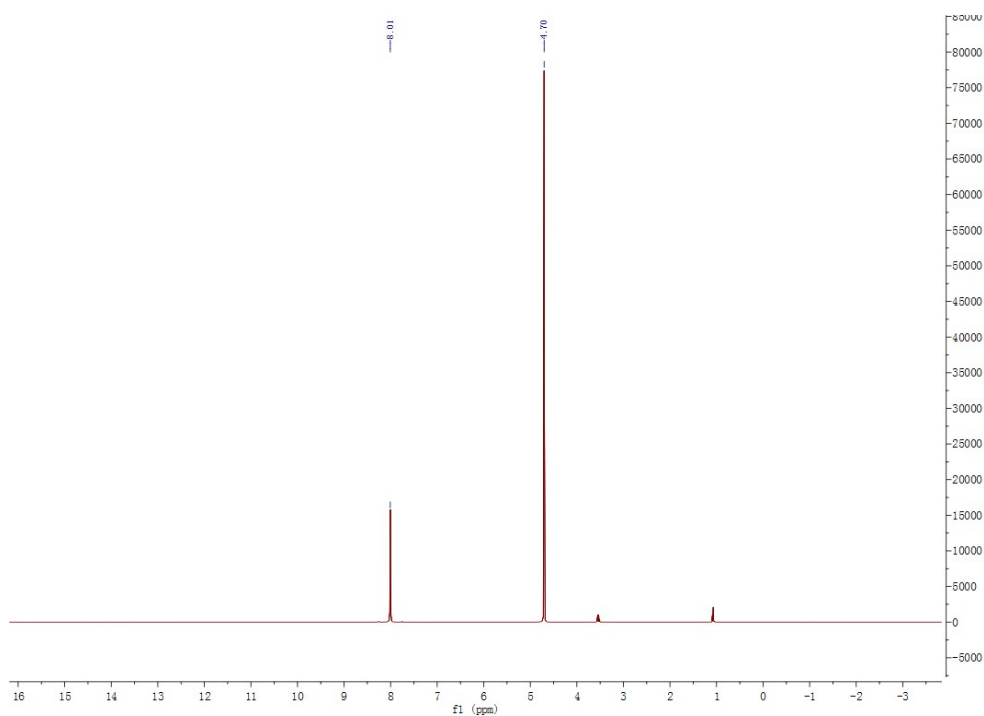

**Fig. S3**  $^1\text{H}$  NMR spectra of 3-amino-1,2,4-Triazole potassium salt.

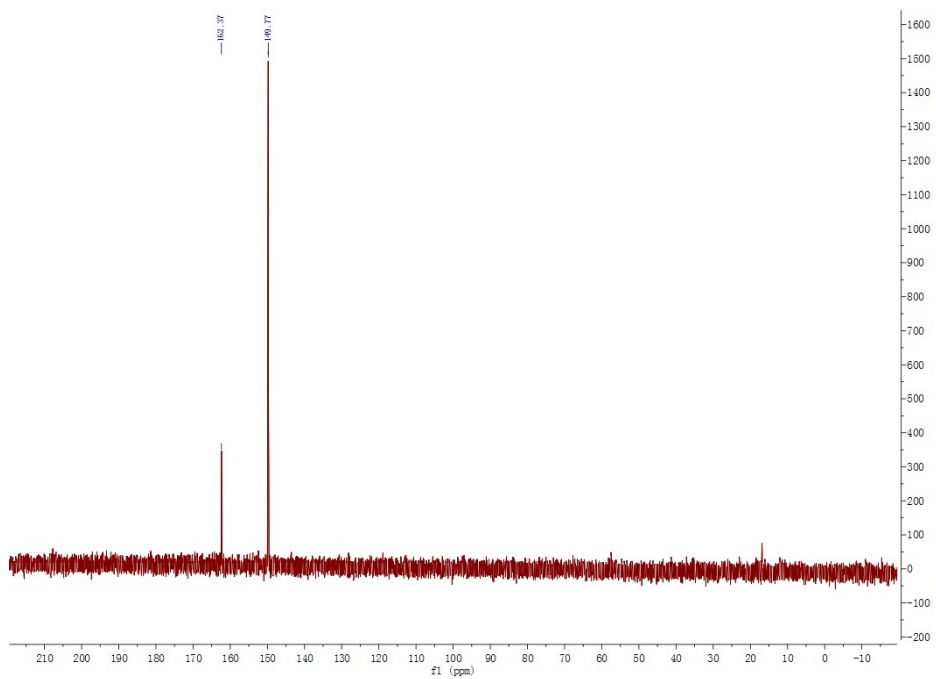

**Fig. S4**  $^{13}\text{C}$  NMR spectra of 3- amino-1,2,4 Triazole potassium salt.

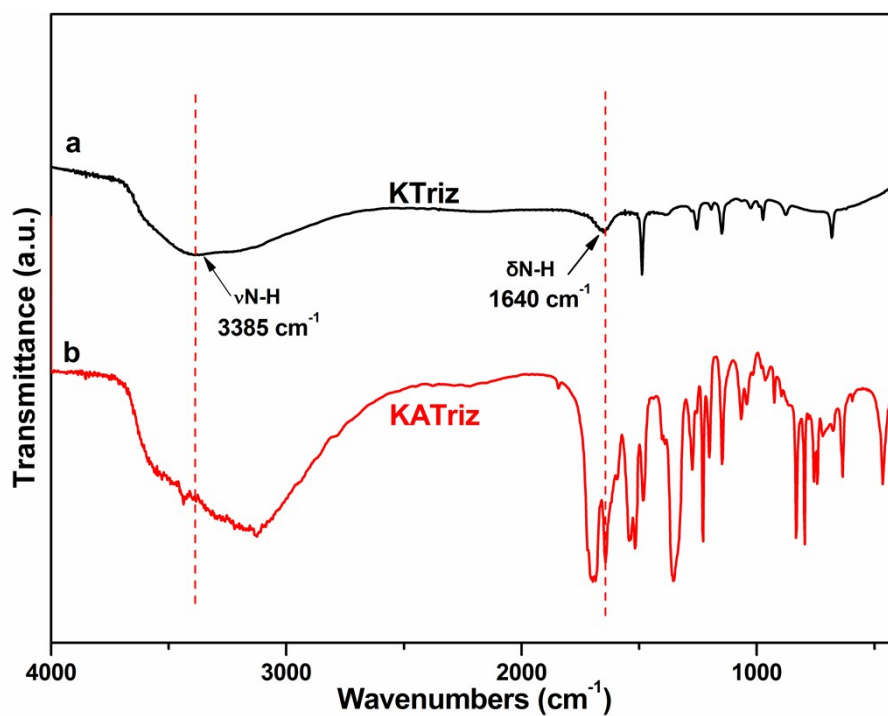

Fig. S5 IR of the solid salts.

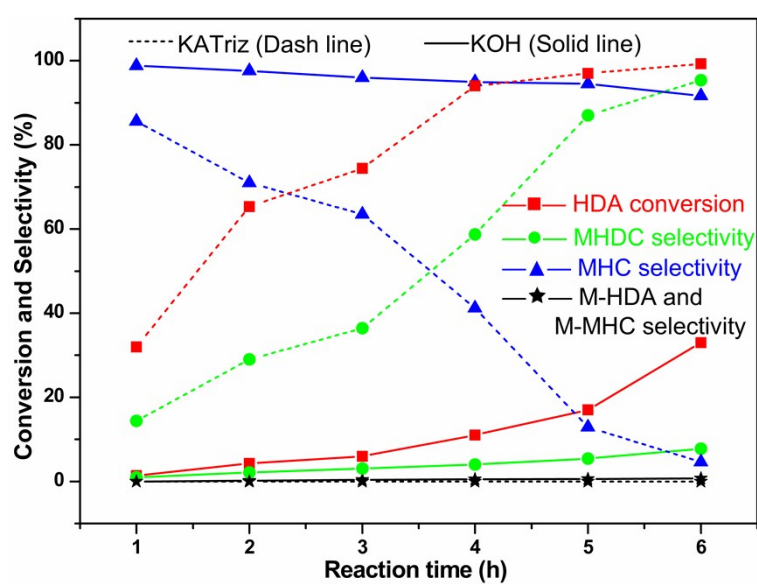

Fig. S6 Time conversion plot for the reaction of HDA with DMC in the presence of KOH (or KATriz) Catalysts. Reaction conditions: 30 mmol HDA; 90 mmol DMC; 5wt% KATriz or KOH (based on the mass of charged HDA); 30 °C, 6 h.

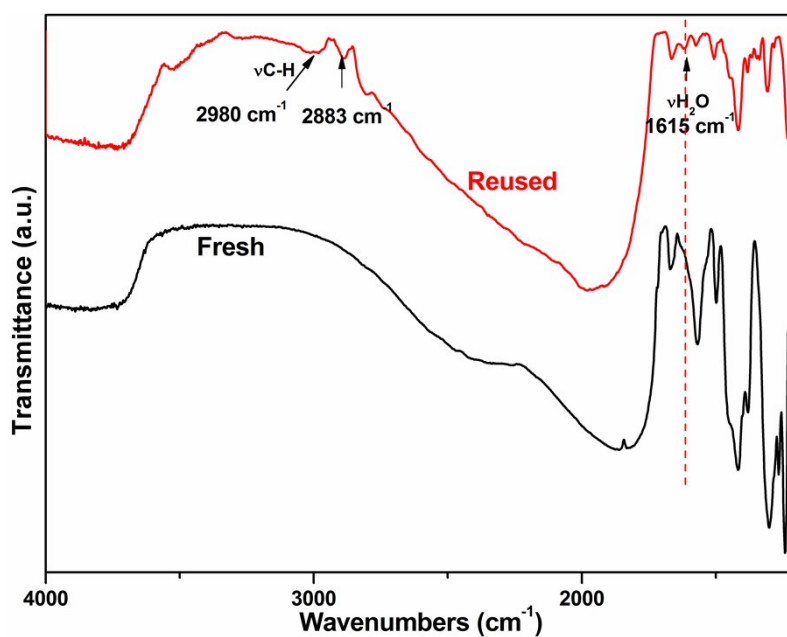

Fig. S7 IR of the KATriz salts before and after use.

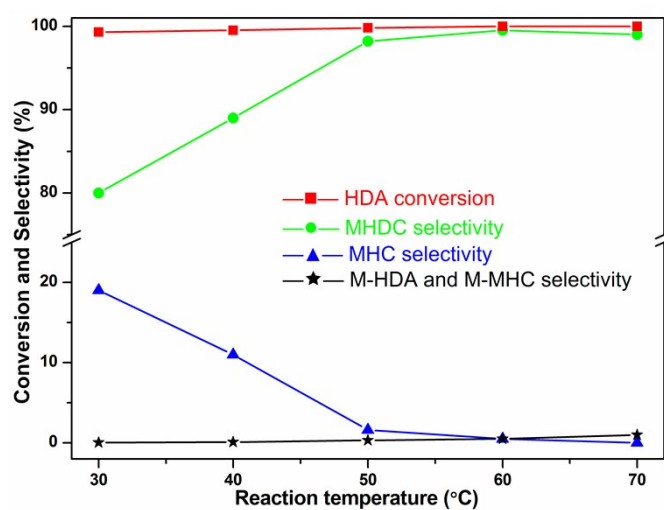

Fig. S8 Effect of reaction temperature on MHDC synthesis. Reaction conditions: 30 mmol HDA; 90 mmol DMC; 5wt% KATriz (based on the mass of charged HDA); 5 h.

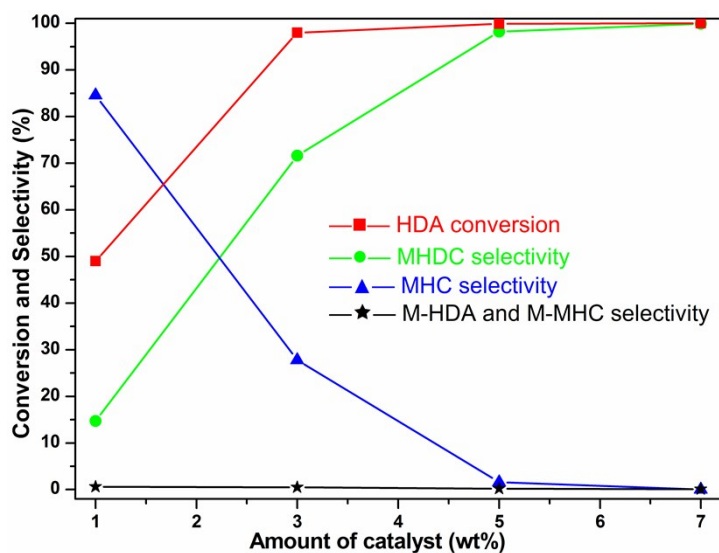

**Fig. S9** Effect of catalyst concentration on MHDC synthesis. Reaction conditions: 30 mmol HDA; 90 mmol DMC; 50 °C; 5 h.

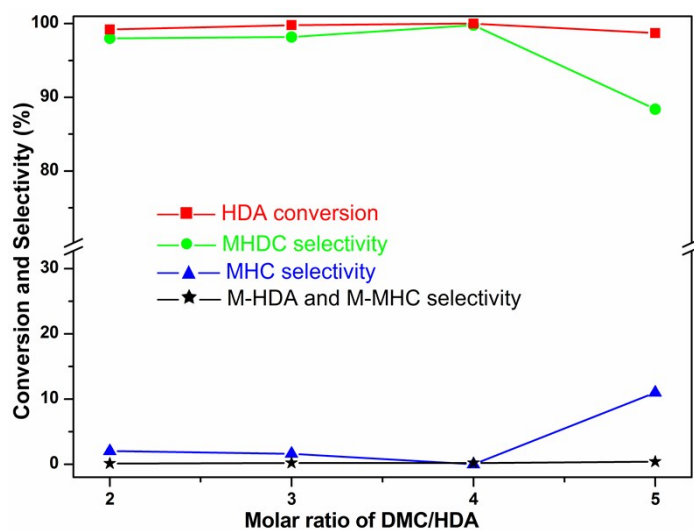

**Fig. S10** Effect of molar ratio of DMC to HDA on MHDC synthesis. Reaction conditions: 5wt% KATriz (based on the mass of charged HDA); 50 °C; 5 h.
